# Supplementary material for: Impaired autophagic flux is associated with the severity of trauma and the role of A2AR in brain cells after traumatic brain injury
Source: PubMed Central journal article supplement (PMC5833790; doi:10.1038/s41419-018-0316-4), 2018-02-14

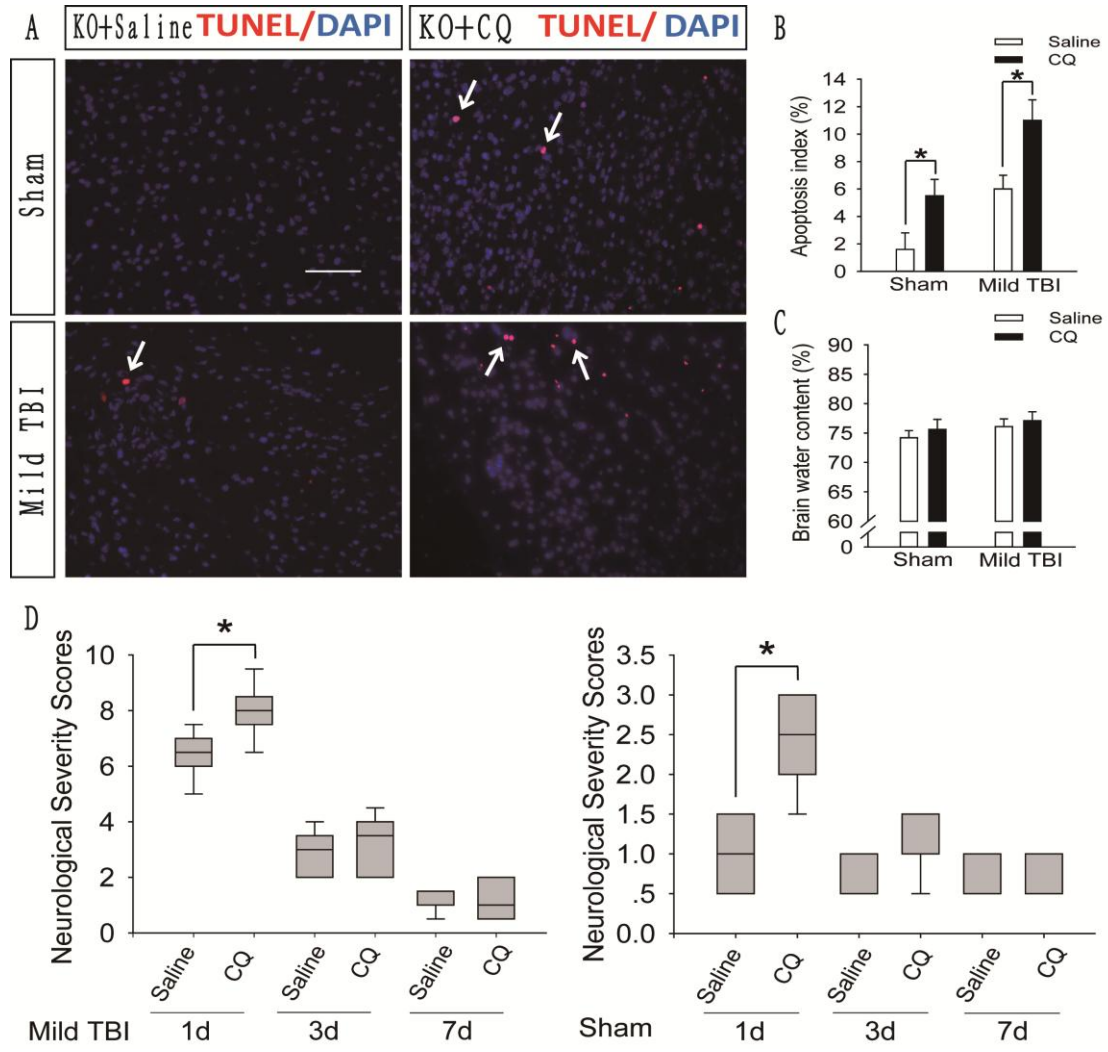

Supplement: 41419_2018_316_MOESM1_ESM.pdf [file 41419_2018_316_MOESM1_ESM.pdf]
